# Supplementary material for: Blue blood on ice: modulated blood oxygen transport facilitates cold compensation and eurythermy in an Antarctic octopod
Source: PubMed Central journal article supplement (PMC4403823; doi:10.1186/s12983-015-0097-x), 2015-03-11

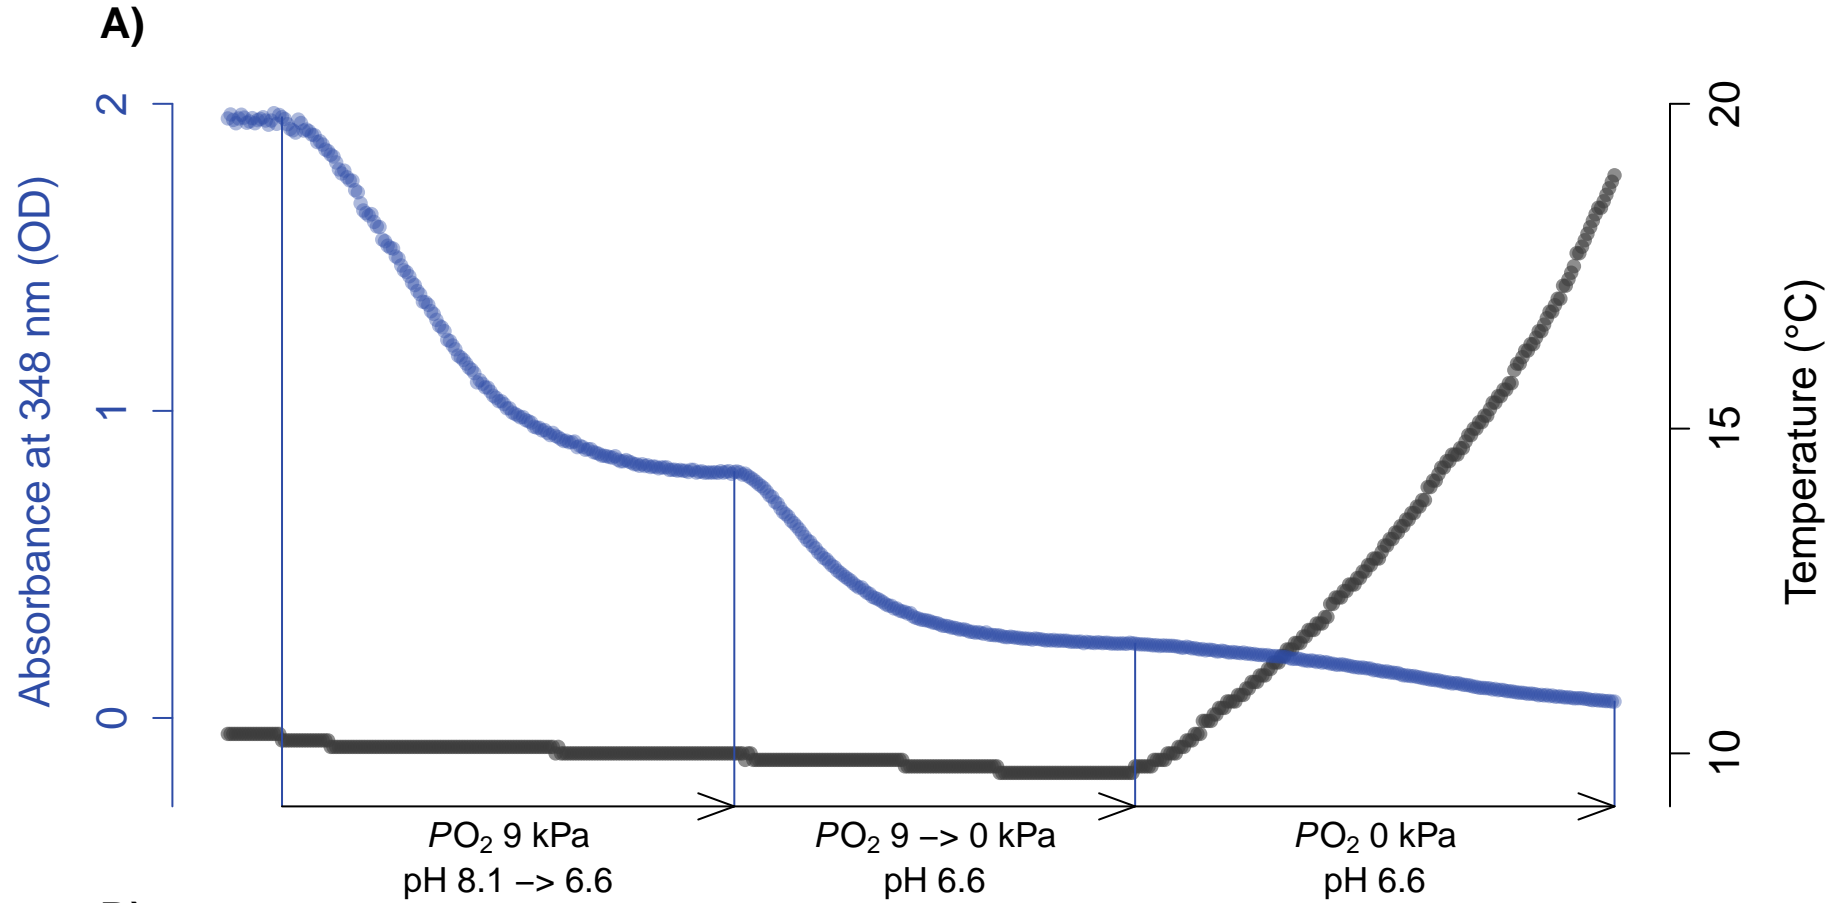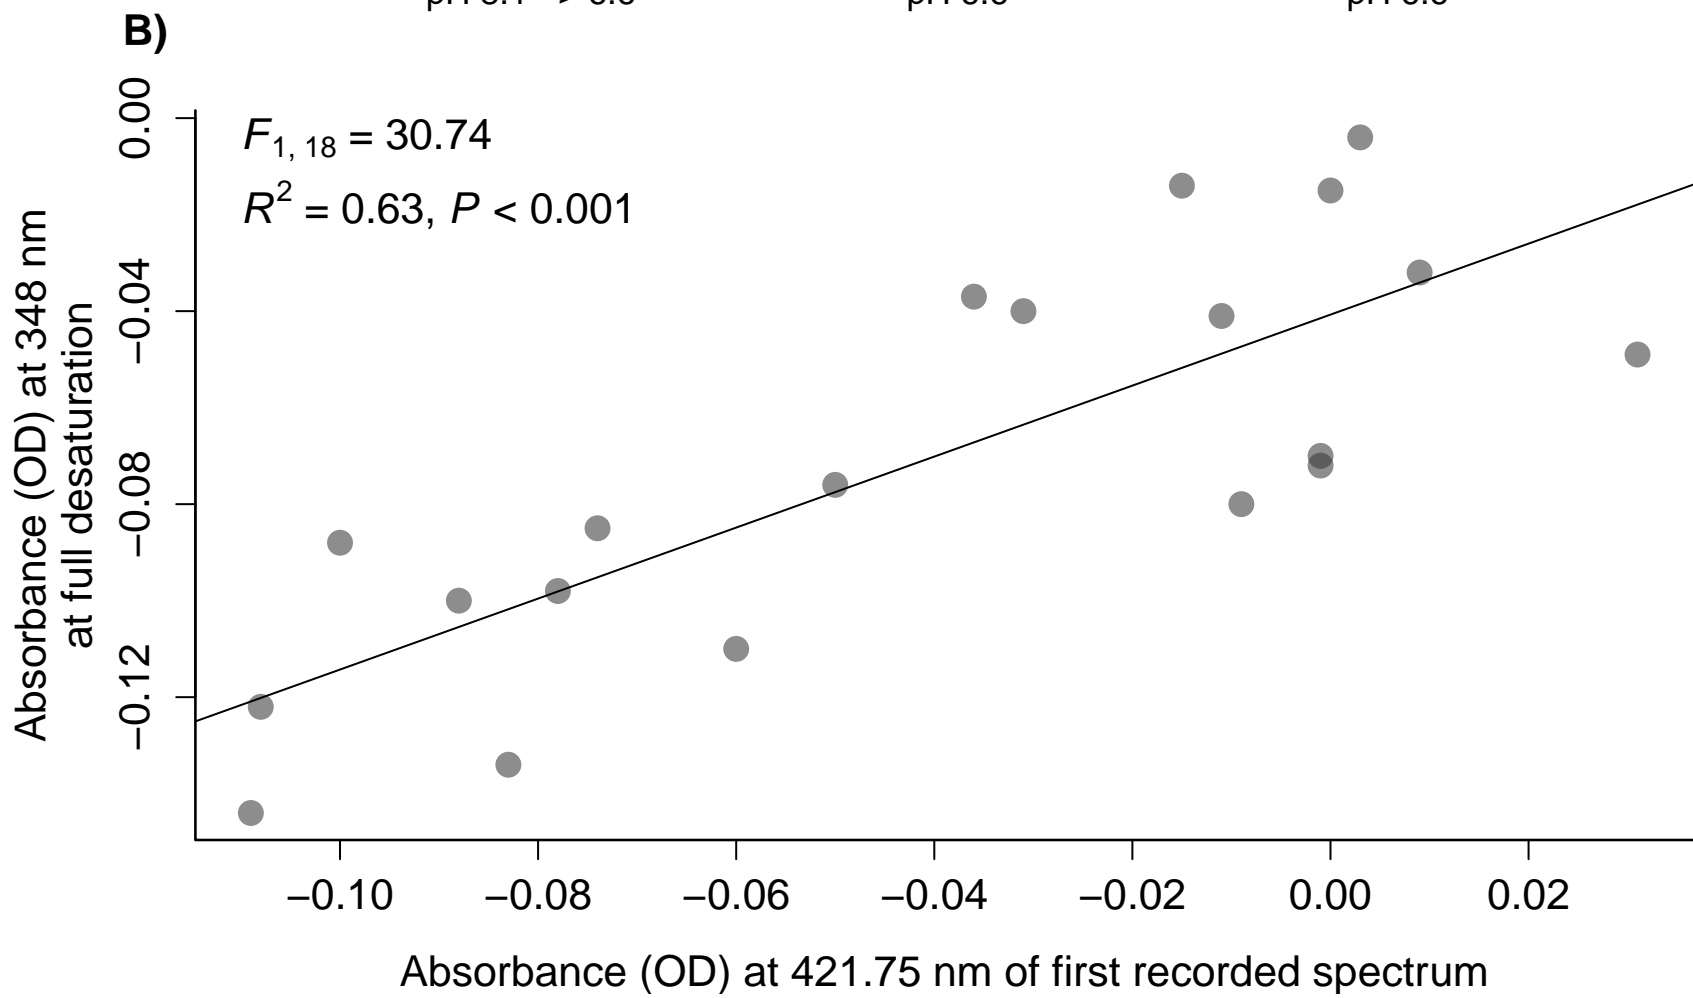

Supplement: 12983_2015_97_MOESM2_ESM.pdf [file 12983_2015_97_MOESM2_ESM.pdf]
